# Supplementary material for: In Situ Preparation and Analysis of Bimetal Co-doped Mesoporous Graphitic Carbon Nitride with Enhanced Photocatalytic Activity
Source: PubMed Central journal article supplement (PMC7770843; doi:10.1007/s40820-018-0236-y), 2019-01-23
Supplement: 40820_2018_236_MOESM1_ESM.pdf [file 40820_2018_236_MOESM1_ESM.pdf]

Supporting Information for

## **In-situ Preparation and Analysis of Bimetal Co-doped Mesoporous Graphitic Carbon Nitride with Enhanced Photocatalytic Activity**

Wanbao Wu<sup>1, #</sup>, Zhaohui Ruan<sup>2, #</sup>, Junzhuo Li<sup>1, #</sup>, Yudong Li<sup>1</sup>, Yanqiu Jiang<sup>1, \*</sup>, Xianzhu Xu<sup>1</sup>, Defeng Li<sup>1</sup>, Yuan Yuan<sup>2, \*</sup>, Kaifeng Lin<sup>1, \*</sup>

<sup>1</sup>School of Chemistry and Chemical Engineering, Harbin Institute of Technology, 92 West Dazhi Street, Nan Gang District, Harbin 150001, People's Republic of China

<sup>2</sup>Key Laboratory of Aerospace Thermophysics, Ministry of Industry and Information Technology, Harbin Institute of Technology, 92 West Dazhi Street, Nan Gang District, Harbin 150001, People's Republic of China

<sup>#</sup>W. Wu, Z. Ruan and J. Li contributed equally to this work

\*Corresponding authors. Email: [jiangyanqiu@hit.edu.cn](mailto:jiangyanqiu@hit.edu.cn) (Y. Jiang); [yuan yuan83@hit.edu.cn](mailto:yuan yuan83@hit.edu.cn) (Y. Yuan); [linkaifeng@hit.edu.cn](mailto:linkaifeng@hit.edu.cn) (K. Lin)

### **S1 Experimental Section**

#### **S1.1 Materials**

Guanidine hydrochloride, cobalt hexahydrate chloride, and sodium molybdate were all purchased from Aladdin, thiourea was purchased from Sinopharm Chemical Reagent Co., Ltd. The materials were used without further purification.

#### **S1.2 Characterizations**

X-ray Diffraction (XRD) measurement was conducted to characterize crystal structure of as-prepared samples on Bruker D8 Advance diffractometer by using Cu K $\alpha$  radiation. Fourier Transform Infrared (FT-IR) spectra was tested in Perkin Elmer 100 spectrometer. The thermal stability of samples was performed by using thermogravimetric (TG) analysis with NETZSCH Instrument STA 449 F3 Jupiter. The chemical state of elements in the as-prepared samples was studied by X-ray photoelectron spectra (XPS) with PHI 5700 ESCA system equipped with an Al K $\alpha$  radiation as a source ( $h\nu = 1486.6$  eV). A Hitachi S-4800 model microscope was adopted to observe the morphologies of as-prepared samples. Transmission electron microscopy (TEM) images were obtained on a Topcon 002B. UV-vis diffuse

reflection spectra (BaSO<sub>4</sub> as the reflectance standard) was analyzed on Perkin Elmer Lambda 750 spectrophotometer from 200 to 800 nm. The BET surface area and pore-size distribution were recorded on Micromeritics ASAP2020. Meanwhile, the photoluminescence (PL) measurement were performed using PerkinElmer LS-55 with 375 nm as excitation wavelength under liquid nitrogen conditions.

### **S1.3 Photoelectrochemical (PEC) Measurement**

CHI electrochemical station (Model 660D) was performed to investigate the electrochemical performances of material using a three-electrode system, and photocurrent was measured under an intermittent transient visible light irradiation, Ag/AgCl electrode (3 M KCl) and Pt plate were used as reference electrode and counter electrode, respectively, the active area of working electrode is confined to 0.19625 cm<sup>2</sup>. The working electrode was prepared through dropping the ink that was fabricated by ultrasonically dispersing appropriate amount of materials in a 5 wt% Nafion alcoholic solution. The material was defined at 0.2 mg cm<sup>-2</sup>. Na<sub>2</sub>SO<sub>4</sub> aqueous solution was used as electrolyte. The light source was a 300 W Xe lamp.

### **S1.4 DFT Calculations**

For further illustration of the effects of doping Co and Mo element on the optical properties and chemical properties of g-C<sub>3</sub>N<sub>4</sub> with more detail, the first principle calculations with density functional theory are adopted in this work. All of the calculations with DFT are implemented on CASTEP module. Geometry optimizations for g-C<sub>3</sub>N<sub>4</sub> (P-CN), Co doped g-C<sub>3</sub>N<sub>4</sub> (Co-CN) and Mo doped g-C<sub>3</sub>N<sub>4</sub> (Mo-CN) are performed by treating the exchange-correlation interaction with generalized gradient approximation (GGA) in form of Perdew-Wang (PW91) functional, where a hybrid semi-empirical Ortmann–Bechstedt–Schmidt (OBS) approach was used to correct for Van der Waals (VdW) dispersion forces. Optical properties are calculated with Heyd-Scuseria-Ernzerhof (HSE06) hybrid functional. In DFT for geometry optimization, charge density difference and optical properties for g-C<sub>3</sub>N<sub>4</sub>, Co doped g-C<sub>3</sub>N<sub>4</sub> and Mo doped g-C<sub>3</sub>N<sub>4</sub>, the self-consistent convergence accuracy is set to be 1×10<sup>-6</sup> eV atom<sup>-1</sup>, the convergence criterion for the maximal force on atoms is 0.02 eV Å<sup>-1</sup>, the maximum displacement is 5×10<sup>-4</sup> Å, the cut off energy are set to be 600 eV, and the stress is less than 0.02 GPa. For geometry optimization, the Monkhorst-Pack k-mesh are all set to be 8×8×6. For optical properties, the Monkhorst-Pack k-mesh are all set to be 3×3×1.

### **Supplementary Figures**

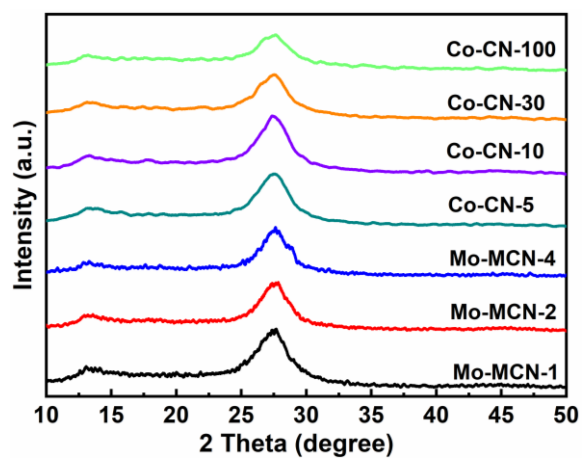

**Fig. S1** XRD patterns of Mo-MCN samples and Co-CN

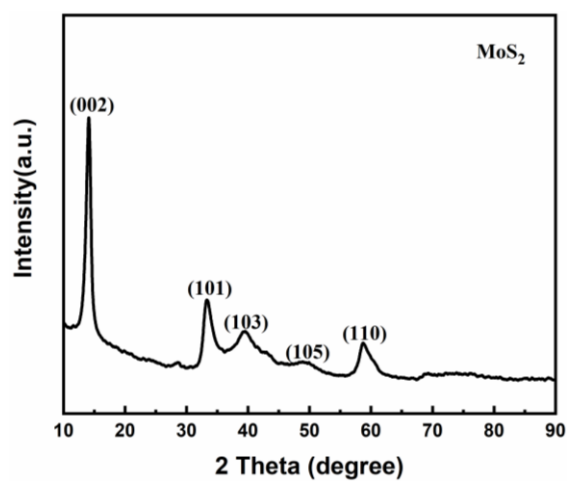

**Fig. S2** XRD pattern of MoS<sub>2</sub> nanosheets

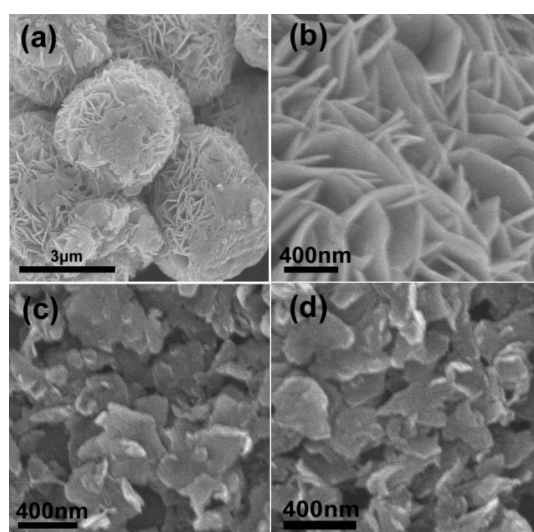

**Fig. S3** SEM images of MoS<sub>2</sub> nanoflowers (**a** and **b**) and MoS<sub>2</sub> nanosheets (**c** and **d**)

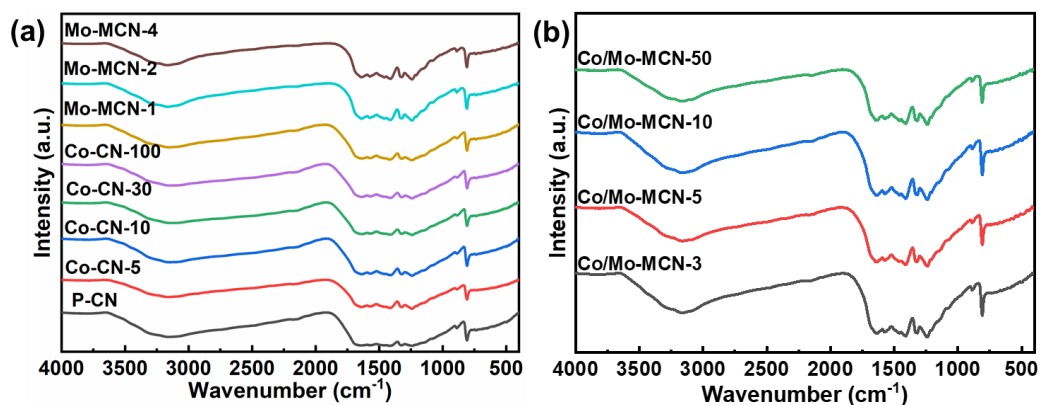

**Fig. S4** FI-IR spectra of **a** P-CN, Co-CN, and Mo-MCN and **b** Co/Mo-MCN

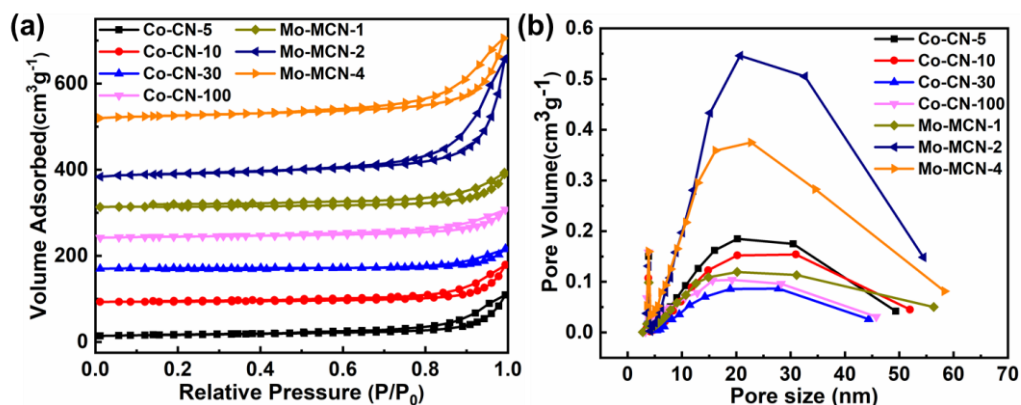

**Fig. S5** **a** Nitrogen adsorption–desorption isotherms and **b** corresponding pore size distribution curves of Co-CN and Mo-MCN

**Table S1** physical properties of the as-prepared samples

| Sample       | S <sub>BET</sub><br>(m <sup>2</sup> g <sup>-1</sup> ) | Center pore size | Pore Volume<br>(cm <sup>3</sup> g <sup>-1</sup> ) |
|--------------|-------------------------------------------------------|------------------|---------------------------------------------------|
| P-CN         | 16.1                                                  | 29.2             | 0.11                                              |
| Co-CN-5      | 16.9                                                  | 20.2             | 0.11                                              |
| Co-CN-10     | 19.9                                                  | 21.2             | 0.14                                              |
| Co-CN-30     | 18.5                                                  | 19.3             | 0.08                                              |
| Co-CN-100    | 29.7                                                  | 16.7             | 0.12                                              |
| Mo-MCN-1     | 16.8                                                  | 20.2             | 0.13                                              |
| Mo-MCN-2     | 82.4                                                  | 20.7             | 0.44                                              |
| Mo-MCN-4     | 65.1                                                  | 22.7             | 0.31                                              |
| Co/Mo-MCN-3  | 61.7                                                  | 21.9             | 0.25                                              |
| Co/Mo-MCN-5  | 60.6                                                  | 22.3             | 0.28                                              |
| Co/Mo-MCN-10 | 61.4                                                  | 21.6             | 0.32                                              |
| Co/Mo-MCN-50 | 65.8                                                  | 20.7             | 0.22                                              |

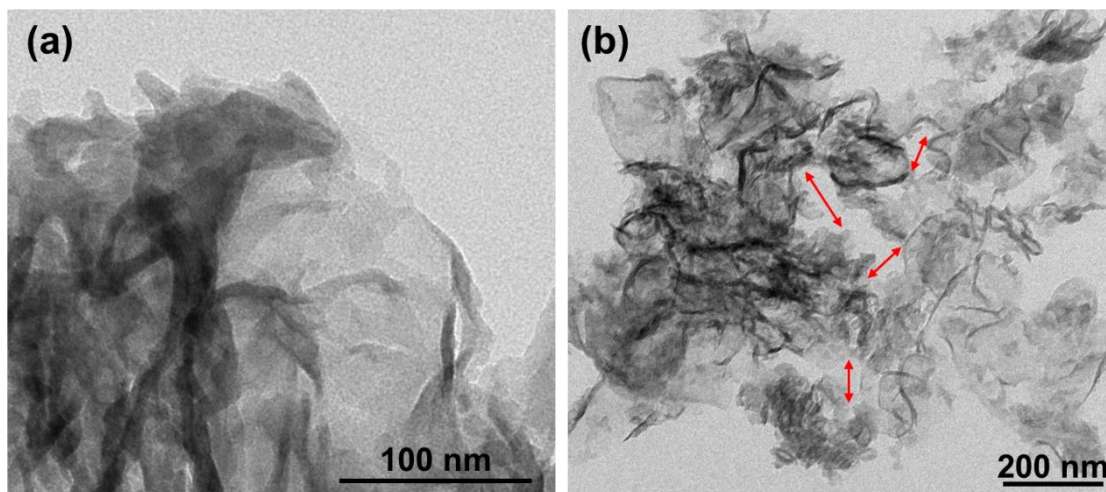

**Fig. S6** TEM images of **a** Co-CN-5 and **b** Mo-MCN-2

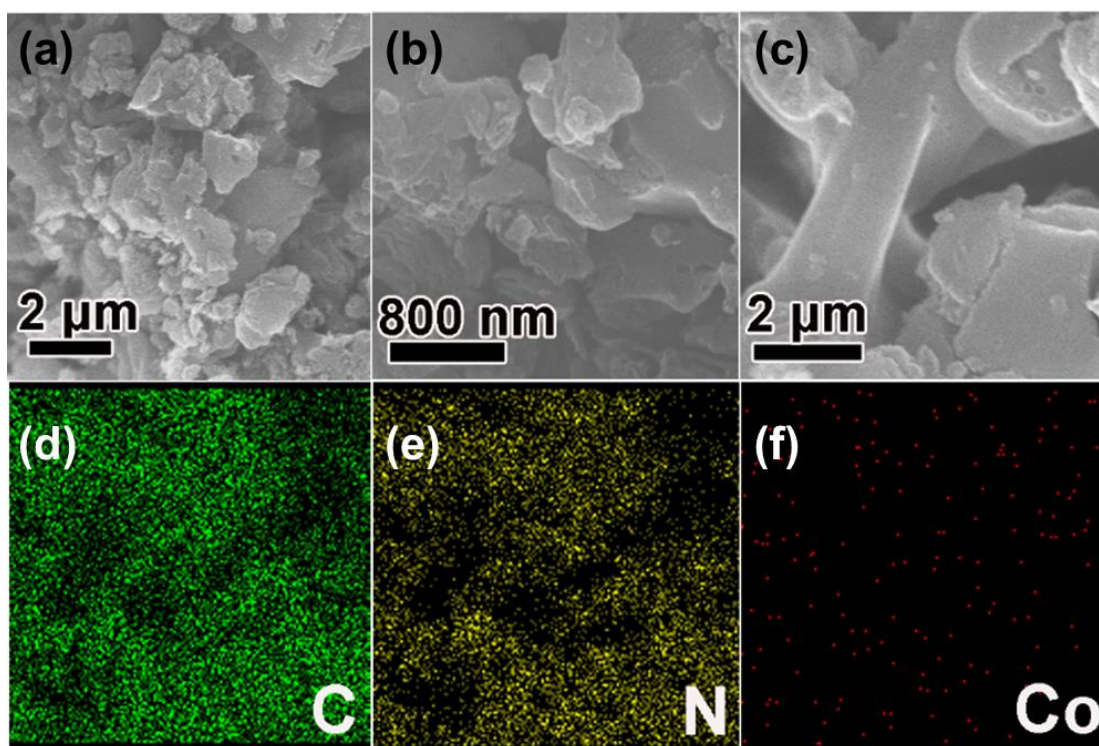

**Fig. S7** SEM images of **a** Co-CN-10, **b** Co-CN-30, **c** Co-CN-100 and **d-f** EDS mapping of Co-CN-5

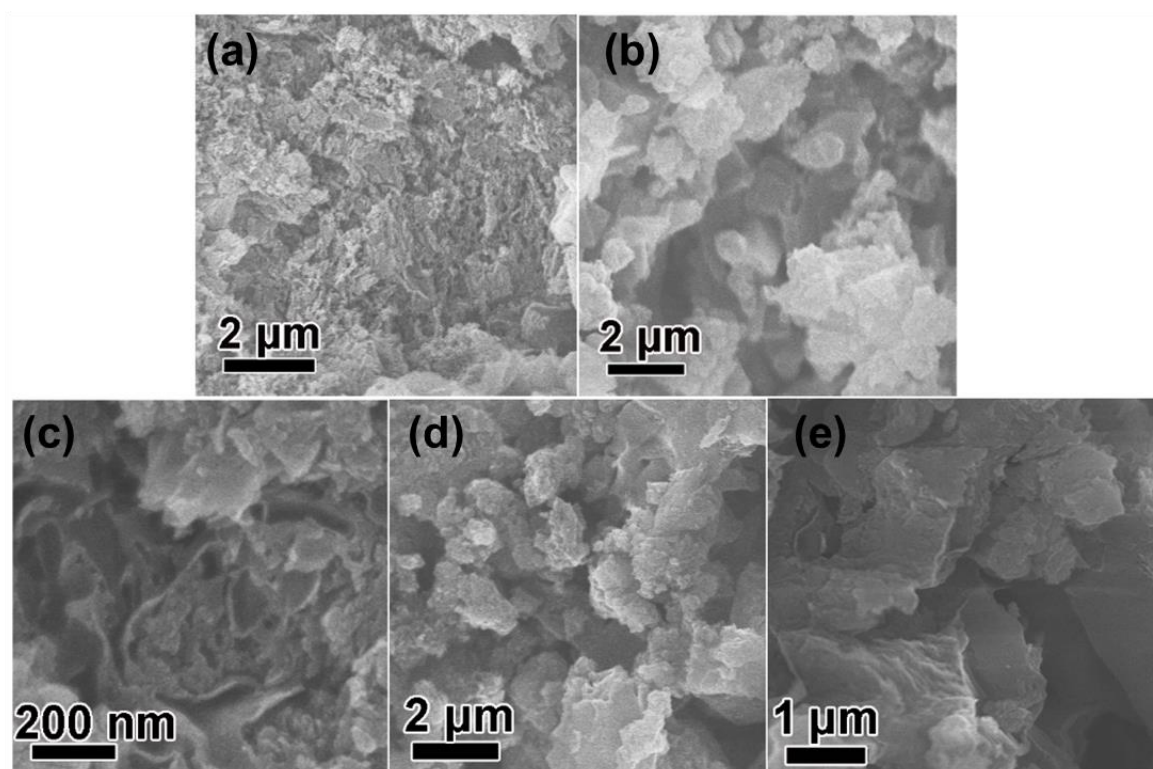

**Fig. S8** SEM images of **a** Mo-MCN-1, **b** Mo-MCN-4, **c** Co/Mo-MCN-3, **d** Co/Mo-MCN-10, and **e** Co/Mo-MCN-50

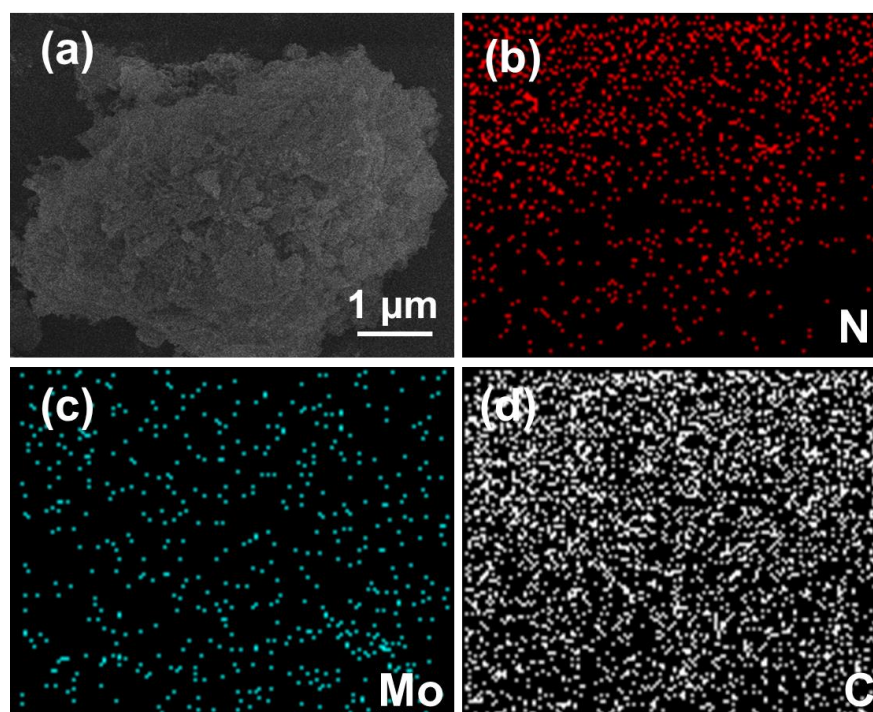

**Fig. S9** **a** SEM image and **b-d** EDS mappings of Mo-MCN-2

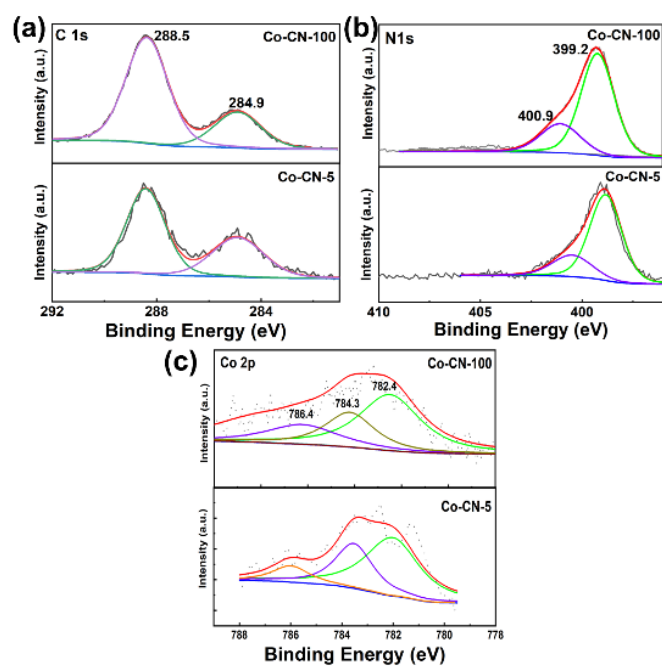

**Fig. S10** The XPS spectra of **a** C1s, **b** N1s, and **c** Co2p for Co-CN-5 and Co-CN-100

**Table S2** Co content or Mo content of materials

| Materials   | Co (wt%) | Mo (wt%) |
|-------------|----------|----------|
| Co-CN-5     | 0.042    | —        |
| Co-CN-10    | 0.086    | —        |
| Co-CN-30    | 0.210    | —        |
| Co-CN-100   | 0.729    | —        |
| Mo-MCN-1    | —        | 0.017    |
| Mo-MCN-2    | —        | 0.095    |
| Mo-MCN-4    | —        | 0.284    |
| Co/Mo-MCN-5 | 0.081    | 0.058    |

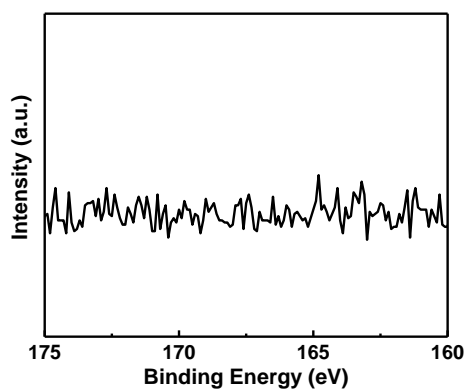

**Fig. S11** XPS spectrum of S2p of Co/Mo-MCN-5

**Table S3** Elemental composition of P-CN, Co-CN materials, Mo-MCN materials, and Co/Mo-MCN materials obtained from CHN analysis

| Materials    | Content (wt%) |       |      | C/N Ratio (in mole) |
|--------------|---------------|-------|------|---------------------|
|              | C             | N     | H    |                     |
| P-CN         | 33.46         | 57.29 | 2.29 | 0.68                |
| Co-CN-5      | 32.79         | 57.44 | 2.34 | 0.66                |
| Co-CN-10     | 32.67         | 57.86 | 2.20 | 0.66                |
| Co-CN-30     | 32.58         | 57.54 | 2.23 | 0.66                |
| Co-CN-100    | 32.01         | 57.26 | 2.25 | 0.65                |
| Mo-MCN-1     | 32.97         | 58.07 | 2.02 | 0.67                |
| Mo-MCN-2     | 32.79         | 58.40 | 1.99 | 0.65                |
| Mo-MCN-4     | 32.05         | 56.67 | 2.02 | 0.65                |
| Co/Mo-MCN-3  | 32.38         | 58.64 | 2.16 | 0.64                |
| Co/Mo-MCN-5  | 32.61         | 59.07 | 2.09 | 0.64                |
| Co/Mo-MCN-10 | 32.32         | 58.60 | 2.11 | 0.64                |
| Co/Mo-MCN-50 | 30.96         | 55.32 | 2.07 | 0.64                |

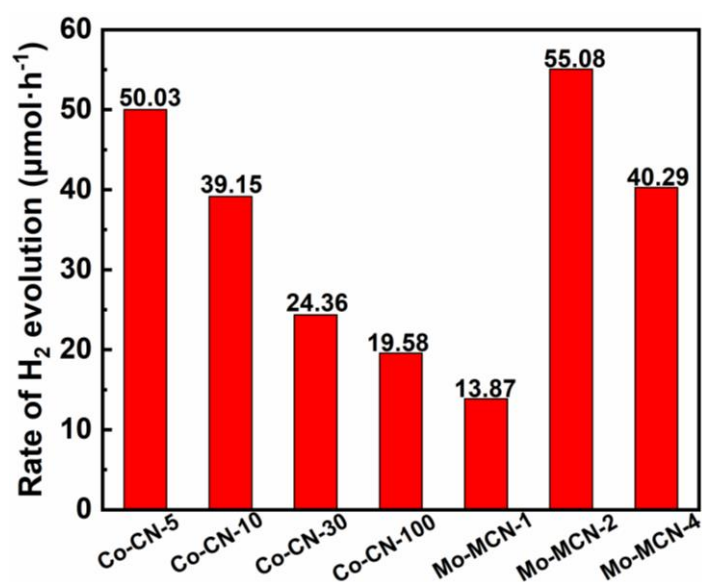

**Fig. S12** Photocatalytic H<sub>2</sub> evolution rate of Co-CN materials and Mo-MCN materials



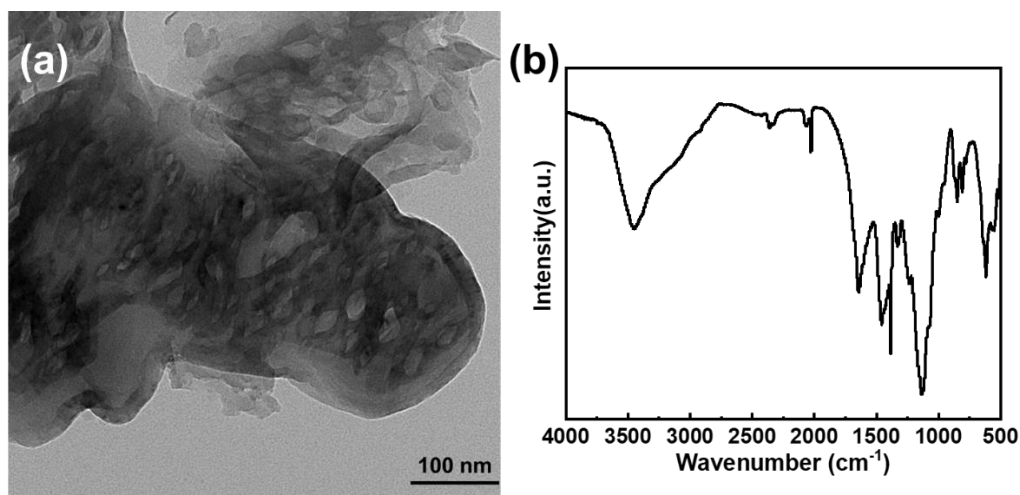

**Fig. S13** **a** TEM image and **b** IR spectrum of reused Co/Mo-MCN-5

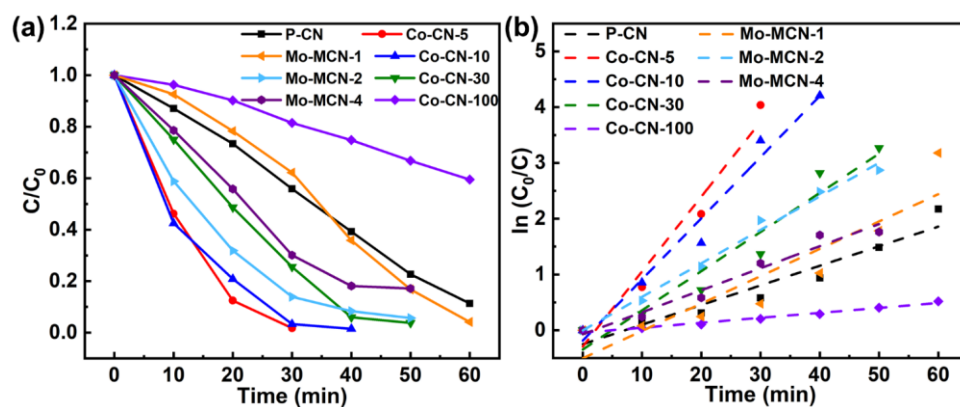

**Fig. S14** **a** Photocatalytic activities and **b** kinetic curves of P-CN, Co-CN and Mo-MCN for degradation of RhB under visible-light irradiation

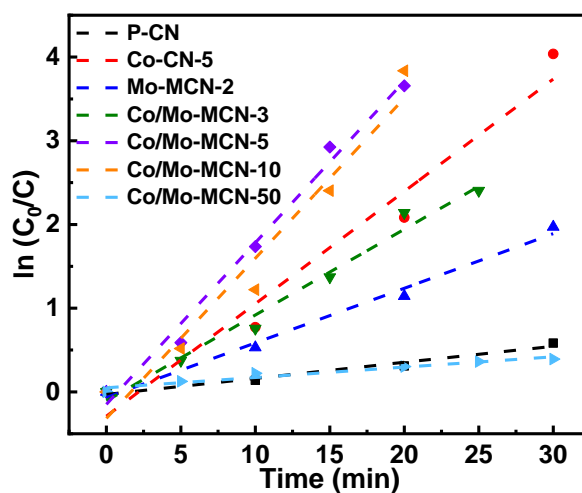

**Fig. S15** Kinetic curves of Co/Mo-MCN for degradation of RhB under visible-light irradiation

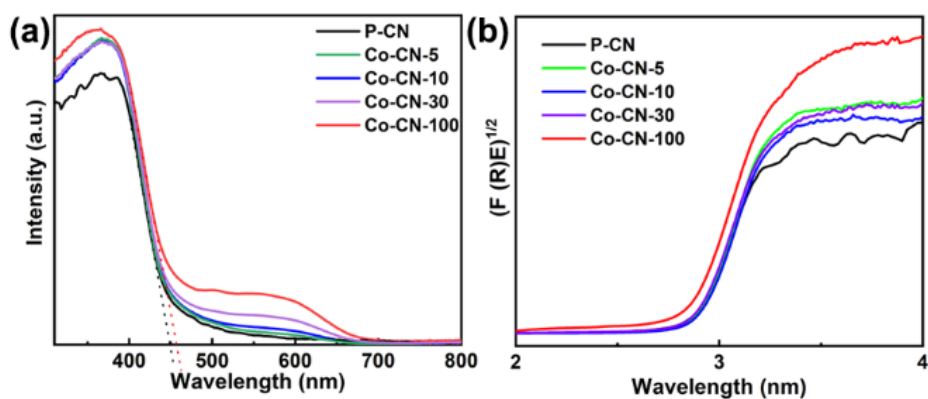

**Fig. S16** **a** UV-Vis diffuse reflectance spectra and **b** band gaps of P-CN and Co-CN

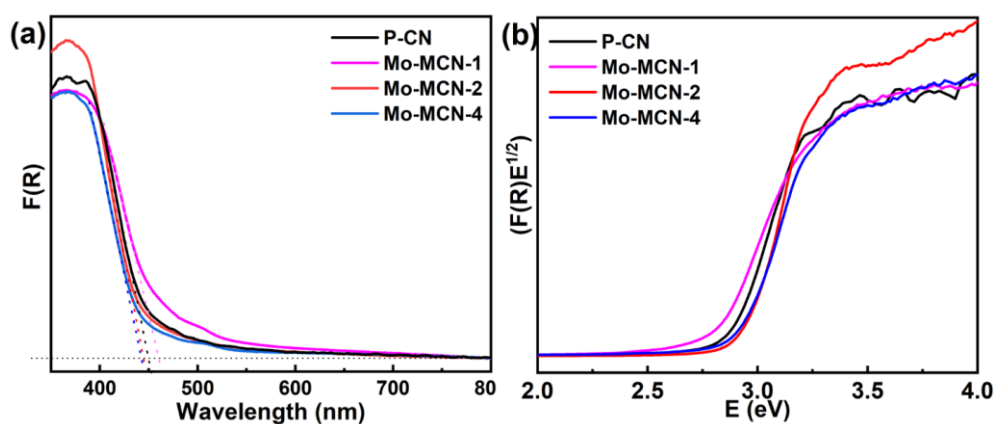

**Fig. S17** **a** UV-Vis diffuse reflectance spectra and **b** band gaps of P-CN and Mo-MCN

**Table S4** The optical absorption thresholds and band gaps of materials

| Material    | Absorption edge (nm) | Bandgap (eV) |
|-------------|----------------------|--------------|
| P-CN        | 447                  | 2.77         |
| Co-CN-5     | 448                  | 2.76         |
| Co-CN-10    | 450                  | 2.75         |
| Co-CN-30    | 453                  | 2.74         |
| Co-CN-100   | 456                  | 2.72         |
| Mo-MCN-1    | 460                  | 2.69         |
| Mo-MCN-2    | 444                  | 2.79         |
| Mo-MCN-4    | 442                  | 2.80         |
| Co/Mo-MCN-5 | 447                  | 2.77         |

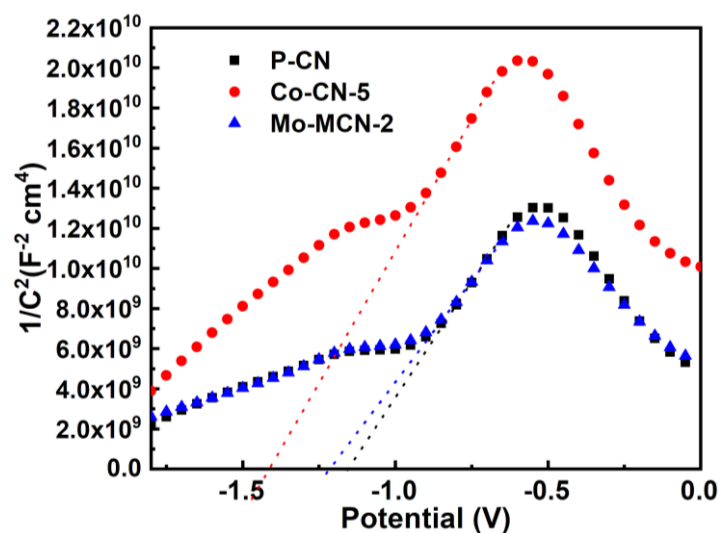

**Fig. S18** Mott-Schottky (MS) plots of Co-CN-5 and Mo-MCN-2

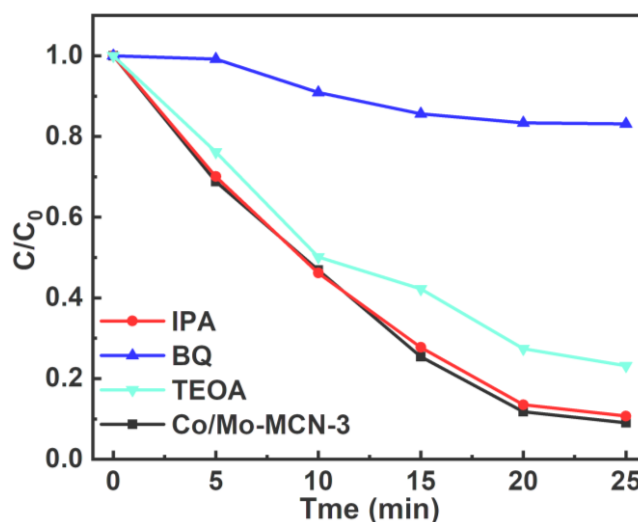

**Fig. S19** Species-trapping experiments for degradation RhB over Co/Mo-MCN-3 photocatalysts

**Table S5** Details of the geometry optimization for different doping site

| Materials           | a    | b     | c     | $\alpha$ | $\beta$ | $\gamma$ | Final energy (eV) |
|---------------------|------|-------|-------|----------|---------|----------|-------------------|
| P-CN                | 7.13 | 12.35 | 6.56  | 90       | 90      | 90       |                   |
| Co-CN (in bridging) | 6.64 | 6.97  | 12.10 | 90       | 89.93   | 90       | -13443.91         |
| Co-CN (in cave)     | 7.10 | 6.41  | 12.37 | 90       | 90      | 90       | -13442.05         |
| Mo-CN (in bridging) | 6.65 | 6.97  | 12.09 | 90       | 90.32   | 90       | -13443.92         |
| Mo-CN (in cave)     | 6.50 | 7.10  | 12.30 | 90       | 90      | 90       | -14334.82         |

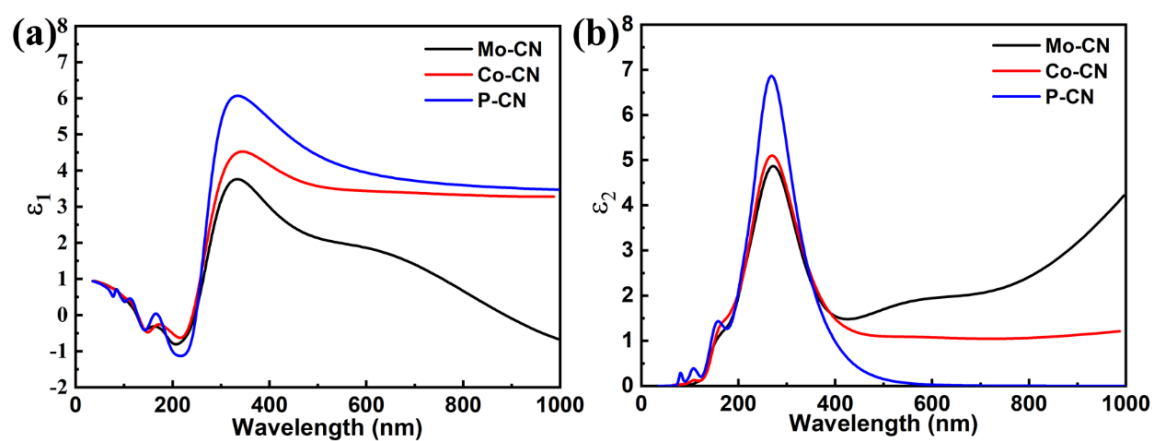

**Fig. S20** **a** Real part and **b** imaginary part of the frequency-dependent dielectric function of PCN, Co-CN and Mo-CN

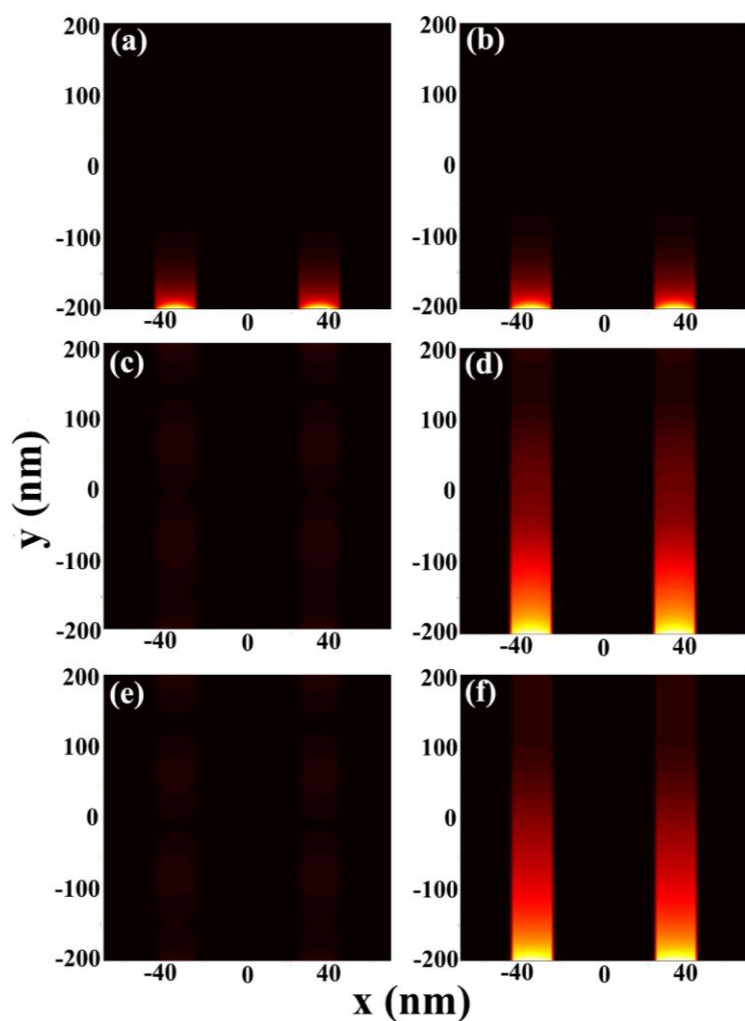

**Fig. S21** Optical absorption power of **(a, c and e)** P-CN and **(b, d and f)** Mo-MCN when the wavelength is 300 nm **(a and b)**, 500 nm **(c and d)** and 700 nm **(e and f)**
